# Supplementary material for: Interplay among H3K9-editing enzymes SUV39H1, JMJD2C and SRC-1 drives p66Shc transcription and vascular oxidative stress in obesity
Source: Oxford University Press journal article supplement (doi:10.1093/eurheartj/ehx615), 2017-10-10
Supplement: eurheartj_40_4_383_s6.doc [file eurheartj_40_4_383_s6.doc]

**SUPPLEMENTARY MATERIAL**

**Study population**

The study population included 21 patients with severe abdominal obesity (age 49.5 ± 4.6 years) and 20 non obese control subjects (age 48.4 ± 7.0 years, **Table 1**). Obese patients were recruited among 220 consecutive patients referring to the Department of Endocrinology (University of Pisa, Italy) from January 2010 to January 2014 for screening in view of laparoscopic bariatric surgery. The exclusion criteria were: history or clinical evidence of hypertension (blood pressure >140/90 mmHg), smoking history, ethanol consumption (more than 60 g or one-half liter of wine/day), hypercholesterolemia, diabetes mellitus, overt cardiovascular disease, renal dysfunction or menopause. Patients taking cardiovascular or metabolic drugs were also excluded. Control subjects were recruited among patients hospitalized in the Surgery Unit (University of Pisa, Italy) to undergo laparoscopic surgery for cholecystectomy. The study protocol was approved by Local Ethical Committee and, in accordance with institutional guidelines, all participants were aware of the investigational nature of the study and gave written consent for their participation.

**Anthropometric and biochemical measurements**

Sitting blood pressure (average of 3 measurements) was measured with a mercury sphygmomanometer, by means of a standard cuff and a large cuff in lean and obese individuals, respectively. Venous blood samples were taken for measurement of standard hematology and insulin (radioimmunoassay). Insulin resistance was estimated by the homeostasis model assessment of insulin resistance (HOMA-IR).1

**Functional experiments in small visceral fat arteries**

Endothelium-dependent and endothelium-independent relaxations were assessed in a pressurized myograph by measuring responses to cumulative concentrations of acetylcholine (Ach, 1 nmol/l to 100 µmol/l, Sigma Chemicals, St. Louis, Missouri) and sodium nitroprusside (0.01 to 100 µmol/l, Sigma Aldrich, St Louis, USA), respectively. Vessels were pre-contracted with norepinephrine (NE, 1 µmol/l, Sigma Aldrich, St Louis, USA).

**Measurement of superoxide anion levels by ESR spectroscopy**

Superoxide anion generation (O2-) in intact endothelial cells isolated from WT and *LepOb/Ob* mice was assessed by electron spin resonance (ESR) spectroscopy analysis using the spin trap 1-hydroxy-3-methoxycarbonyl-2,2,5,5-tetramethyl-pyrrolidine (CMH). O2- production was determined by following the oxidation of 1-hydroxy-3-carboxy-pyrrolidine (CP-H) to paramagnetic 3-carboxy-proxyl (CP). Signals werequantified by measuring the total amplitude after correctionof baseline and subtraction of background.2

**Detection of nitric oxide levels**

Nitric oxide (NO) levels were assessed in cultured mouse endothelial cells by using a colorimetric assay which provides an accurate measure of total nitrate/nitrite in a simple two-step process (ab65328). Measurements were performed according to the manufacturer’s recommendations.

**Real time PCR**

RNA extraction was performed according to the TRIzol protocol (Sigma Aldrich St Louis, USA). Conversion of the total cellular RNA to cDNA was carried out with Moloney murine leukemia virus reverse transcriptase and random hexamers (Amersham Bioscience, Piscataway, USA) in a final volume of 33 μl, using 1 μg of cDNA according to the manufacturer’s recommendations. Real-time PCR amplification was performed in an MX3000P PCR cycler (Stratagene) using the SYBR Green JumpStart kit (Sigma Aldrich, St Louis, USA) in 25 μL final reaction volume containing 2 μL cDNA, 10 pmol of each primer, 0.25 μL of internal reference dye, and 12.5 μL of JumpStart Taq ReadyMix (buffer, dNTP, stabilizers, SYBR Green, Taq polymerase, and JumpStart Taq antibody). GAPDH or TBP was used as endogenous control for normalizing RNA concentration. The amplification program consisted of 1 cycle at 95 °C for 10 min, followed by 40 cycles with a denaturing phase at 95 °C for 30 s, an annealing phase at 60 °C for 30 s, and an elongation phase at 72 °C for 30 s. Differences in Ct values between test gene and endogenous controls (GAPDH and TBP, ΔCt) were calculated and used for statistical analysis. Primers used are available upon request.

**Gene profiling of chromatin modifying enzymes**

Profiling of chromatin modifying enzymes in VFA from obese and control subjects was performed by using a human epigenetic chromatin modification enzymes PCR Array, according to the manufacturer’s instructions. Raw data and detailed information about array analysis are available in **Table S1**.

**Western Blotting**

Mouse aortas and small human arteries were lysed for immunoblotting (150 mmol/L sodium chloride, 50 mmol/L Tris, 1 mmol/Lsodium fluoride, 1 mmol/L DTT, 1 mmol/LEDTA, 10 µg/µLleupeptin, 10 µg/µLaprotinin, 0.1 mmol/L sodium vanadate, 1 mmol/L PMSF,and 0.5% NP-40). Equal amounts (20 µg) of samples were subjected to SDS-PAGE gel for electrophoresis followed by semidry transfer onto Immobilon-P filter papers(Millipore, Billerica, USA).The membranes were blocked with 5% dry milk or 5% BSA in PBS-Tweenbuffer (0.1% Tween 20; pH 7.5) for 60 minutes and incubated withanti-SUV39H1, anti-JMJD2C and anti-SRC-1 antibodies (Santa Cruz Biotechnology). Anti-rabbit and anti-mouse secondary antibodies were used (Santa Cruz Biotechnology). The immunoreactive bands were detected by an enhancedchemiluminescence system (Millipore, Billerica, USA).Related signals were quantified using a Scion image software (Scion Corp, Frederick, USA).

**Chromatin immunoprecipitation (ChIP) assay**

Chromatin immunoprecipitation was performed in isolated endothelial cells and tissue extracts (human arteries and mouse aortas) by using Magna ChIP Assay Kit (Millipore, Billerica, USA) according to the manufacturer’s instructions. Briefly, human and mouse vessels were fixed for 10 minutes with 37% paraformaldehyde. After stopping cross-linking by addition of 0.1 M glycine, the tissues were sonicated and centrifuged. ChIP was performed by using 10 μg of anti-H3K9 2m, anti-H3K9 3m, and anti-H3K9ac (Millipore, Billerica, USA) and equivalent amount of mouse IgG as negative control. Washes and elution of the IP DNA were performed according to the Magna ChIP protocol. ChIP quantifications of p66Shc promoter were performed by Real time PCR (primers are available upon request). Quantifications were performed using the comparative cycle threshold method and are reported as the n fold difference in antibody-bound chromatin against the input DNA.

**Isolation of endothelial cells from LepOb/Ob mice**

Lung tissue, excluding central bronchi and vessels, was removed and minced with scalpels. Mice were perfused with PBS through the left ventricle and the descending aorta dissected free of perivascular tissue and opened longitudinally. Lung or aorta was incubated for one hour at 37 °C in Dulbecco's modified Eagle medium (DMEM) containing 0.2% (w/v) collagenase type 1 and 0.1% BSA. The tissue digest was passed through a 40 μm strainer and centrifuged at 200*g*. The primary culture and subcultures were grown in DMEM with 5.5 mM glucose, 10% FBS, 25 mM HEPES, gentamycin 1 mg/ml, endothelial cell growth substance, and 10 mg/ml heparin. After trypsin treatment during the first and second passage, cells were sorted with Dynabeads conjugated with sheep anti-rat IgG (Invitrogen, Carlsbad, CA) and complexed to ICAM-2 rat anti-mouse monoclonal antibody (Southern Biotech, Birmingham, Alabama, USA) in DMEM containing 0.1% BSA for 30 minutes at 4 °C. Cells were used at passage 2-4 after serum starvation for 16 hours in DMEM containing 0.1% BSA.

**Cell transfection**

Endothelial cells isolated from WT and *LepOb/Ob* mice were transfected at 70% to 80% confluence with the lipofectamine reagent (Invitrogen, Carlsbad, CA) for 4 hours at 37°C in EBM-2. For SUV39H1 overexpression, endothelial cells were transfected with 10 μg of cloning vector (Origene) or a predesigned mouse SUV39H1 cDNA clone (Origene) together with lipofectamine reagent (Invitrogen, Carlsbad, CA) for 4 hours at 37°C in transfection medium (EBM-2). Gene silencing of JMJD2C and SRC-1 was achieved by using commercially available siRNAs (Santa Cruz Biotechnology, Nunningen Switzerland). A predesigned scrambled siRNA was used as a negative control.

**Assessment of endothelial function after *ex vivo* reprogramming of SUV39H1, JMJD2C and SRC-1**

Freshly harvested aortas from *LepOb/Ob* mice were collected in cold cold Krebs-Ringer bicarbonate solution and used for immediate transfection. Aortas were transfected with SUV39H1 overexpressing plasmid (sc-423224-ACT) as well as JMJD2C (sc-36556) and SRC-1 siRNA (sc-146324). Cloning vector or predesigned scrambled siRNA were used as a negative control. For ex vivo transfection, SUV39H1 overexpressing plasmid as well as JMJD2C and SRC-1 siRNAs were incubated with lipofectamine in tissue culture medium (DMEM) for 20 min. Aortic rings were then incubated with the different transfecting agents overnight at 37°C (with 95%O2/5%CO2). After overnight incubation, 2 mm rings were connected to an isometric force transducer (Multi-Myograph 610M, Danish Myo Technology), suspended in an organ chamber filled with 6 mL Krebs solution (37°C, pH 7.4), and bubbled with 95% O2, 5% CO2. After a 30 minute equilibration period, rings were gradually stretched to the optimal point of their length–tension curve, as determined by the contraction in response to potassium chloride (80 mmol/L). Responses to Ach (10-9 to 10-6 mol/L) were recorded during submaximal contractions to NE (10-7 mol/L). Relaxations were expressed as a percentage of precontracted tension.

***In vivo* editing of chromatin modifiers**

For SUV39H1 overexpression, genetically obese (LepOb/Ob) male mice were injected intravenously with either 40 µg cloning vector (Origene, PCMV6-Kan/Neo, PCMV6KN) or a predesigned mouse SUV39H1 cDNA clone (Origene, MC200652), together with the cationic transfection reagent in vivo-jetPEI (Polyplus Transfection), according to the manufacturer’s instructions. In vivo knockdown of JMJD2C and SRC-1 was performed by injecting predesigned siRNAs, as previously reported.[2](#_ENREF_2) A scrambled-siRNA was used as a control. Amount of JMJD2C and SRC-1 siRNA was selected based on dose optimization studies (data not shown). The siRNA mix at the final dose of 1.6 mg/kg was incubated with in vivo-jetPEI (Polyplus Transfection) as previously reported.[2](#_ENREF_2) Based on time-course studies, SUV39H1 cDNA clone as well as JMJD2C and SRC-1 siRNAs were injected intravenously every 5 days for 4 weeks.

**Tissue harvesting and organ chamber experiments**

Mice were euthanized by intraperitoneal administration of sodium pentobarbital. The entire aorta from the heart to the iliac bifurcation was excised and placed immediately in cold modified Krebs-Ringer bicarbonate solution (pH 7.4, 37°C, 95% O2; 5% CO2) of the following composition (mmol/L): NaCl (118.6), KCl (4.7), CaCl2 (2.5), KH2PO4 (1.2), MgSO4 (1.2), NaHCO3 (25.1), glucose (11.1), and calcium EDTA (0.026). The aorta was cleaned from adhering connective tissue under a dissection microscope, and either snap-frozen in liquid nitrogen and stored at -80°C or used immediately for organ chamber experiments. For isometric tension studies, aorta was cut into 2 mm rings. Each ring was then connected to an isometric force transducer (Multi-Myograph 610M, Danish Myo Technology), suspended in an organ chamber filled with 6 mL Krebs-Ringer bicarbonate solution (37°C, pH 7.4), and bubbled with 95% O2, 5% CO2. After a 30 minute equilibration period, rings were gradually stretched to the optimal point of their length–tension curve, as determined by the contraction in response to potassium chloride (80 mmol/L). Several rings from the same aorta were studied in parallel. Responses to Ach (10-9 to 10-6 mol/L) in the presence or absence of PEG-SOD (150 U/mL) were recorded during submaximal contractions to NE (10-7 mol/L). The NO donor SNP (10-10 to 10-5 mol/L) was added to test endothelium-independent responses. Relaxations were expressed as a percentage of the precontracted tension. Responses obtained in different rings from the same animal were averaged to obtain a single value.

**Supplemental references**

1. Virdis A, Santini F, Colucci R, Duranti E, Salvetti G, Rugani I, Segnani C, Anselmino M, Bernardini N, Blandizzi C, Salvetti A, Pinchera A, Taddei S. Vascular generation of tumor necrosis factor-alpha reduces nitric oxide availability in small arteries from visceral fat of obese patients. J Am Coll Cardiol. 2011;58:238-247

2. Paneni F, Mocharla P, Akhmedov A, Costantino S, Osto E, Volpe M, Luscher TF, Cosentino F. Gene silencing of the mitochondrial adaptor p66(Shc) suppresses vascular hyperglycemic memory in diabetes. Circ Res. 2012;111:278-289

**Supplemental Figures**

**
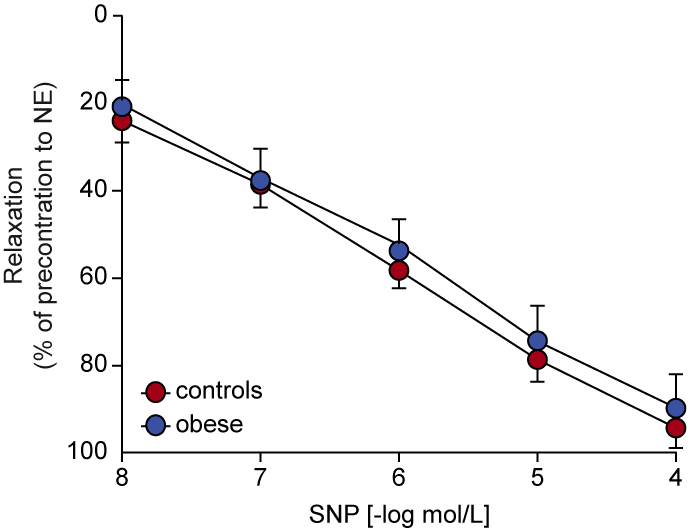
**

**Figure S1.** Endothelium independent relaxations to the NO donor sodium nitroprusside (SNP, 10-8-10-4 mmol/L) in obese and controls. Results are presented as mean ± SD; n=20-21 per group.


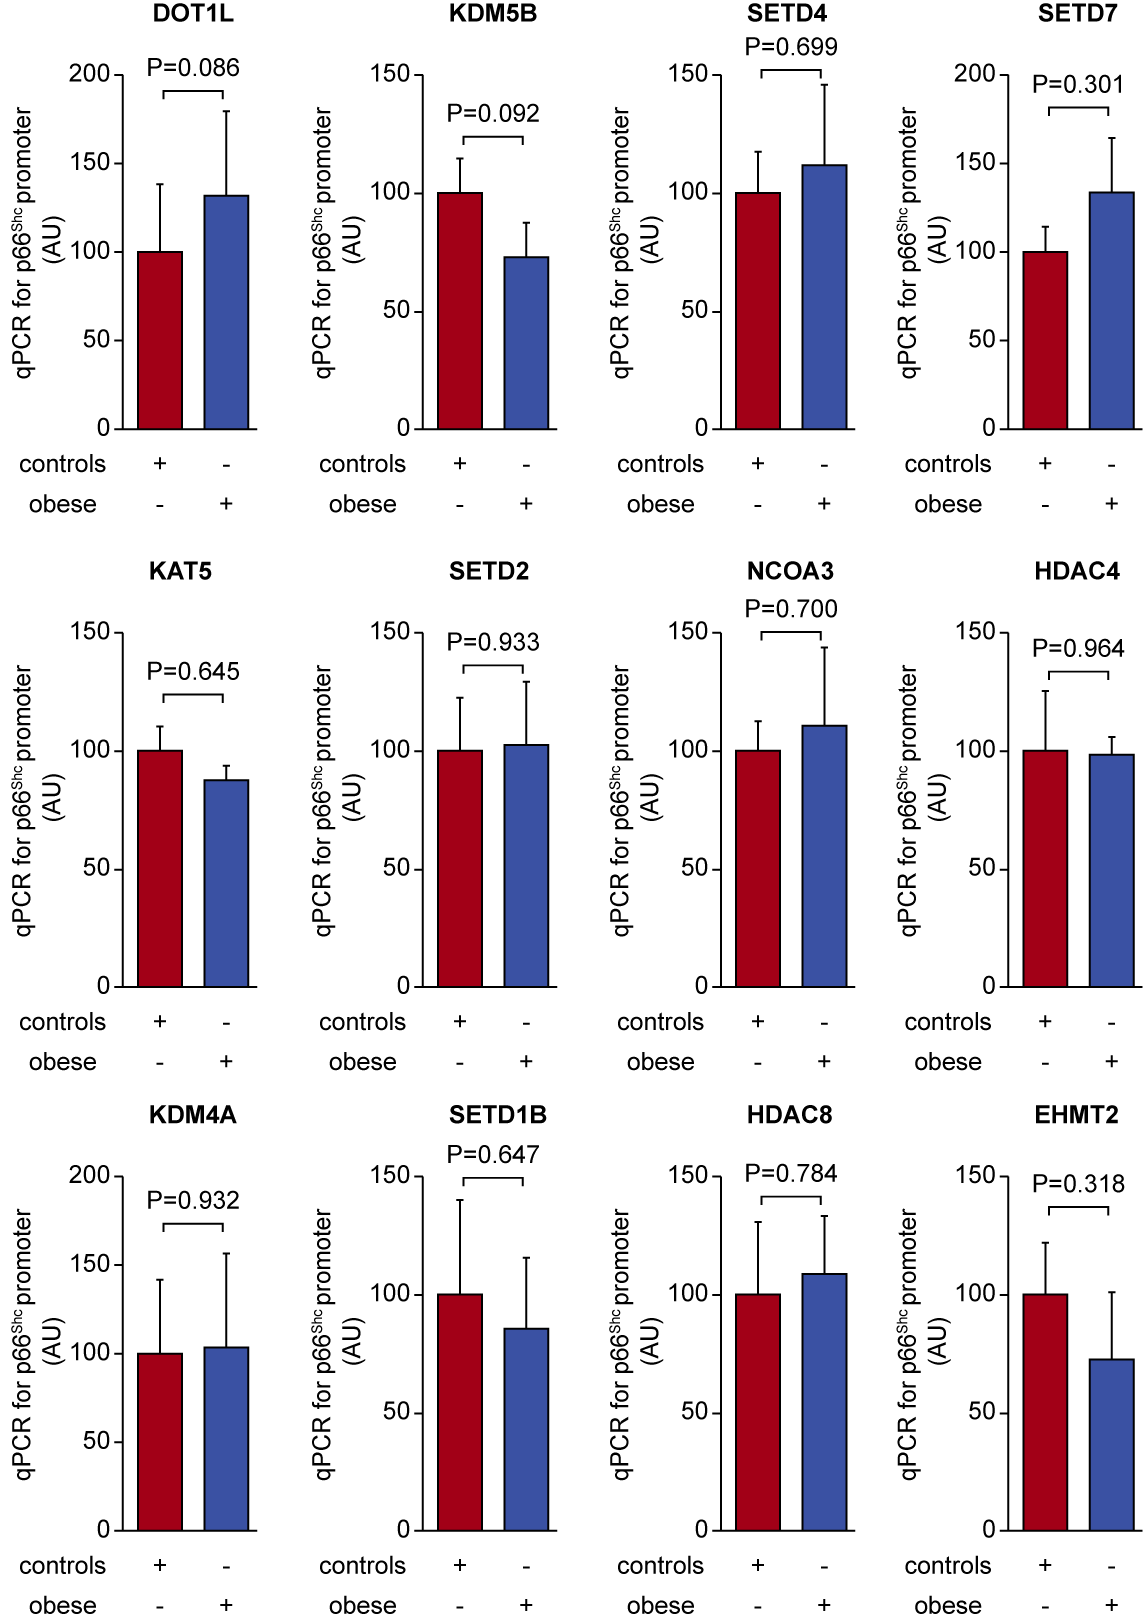


**Figure S2.** ChIP assays showing no interaction of other H3-editing enzymes with human p66Shc promoter. Chromatin immunoprecipitation was performed by using Magna ChIP Assay Kit (Millipore, Billerica, USA) according to the manufacturer’s instructions. Results are presented as mean ± SD; n=20-21 per group. p values refer to Student’s t-test.

**
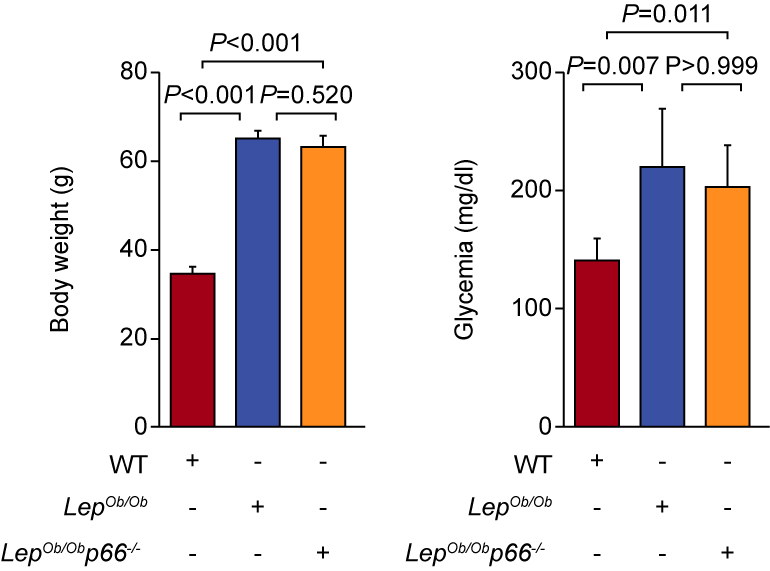
**

**Figure S3**. Body weight and blood glucose levels across the different experimental groups. Results are presented as mean ± SD; n=8-12 per group. p values refer to analysis of variance (ANOVA) followed by Bonferroni’s post-hoc test.


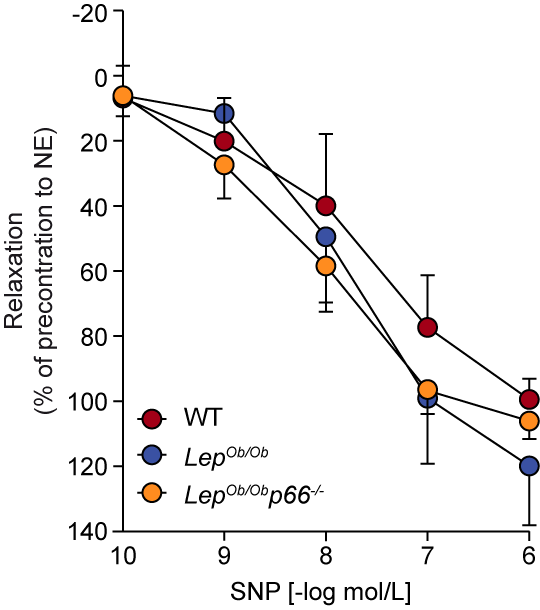


**Figure S4**. Endothelium-independent relaxations to the NO donor sodium nitroprusside (SNP, 10-10-10-6 mmol/L) in the different experimental groups. Results are presented as mean ± SD; n=8-12 per group.


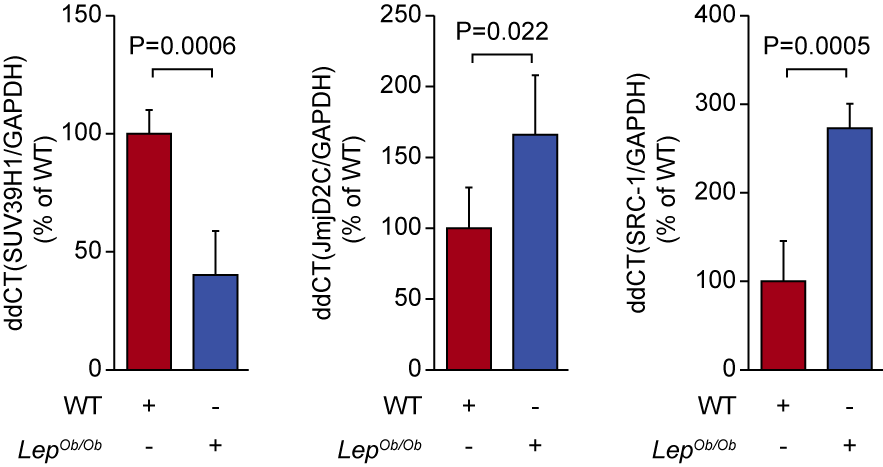


**Figure S5**. Real time PCR showing gene expression of chromatin editing enzymes SUV39H1, JMJD2C and SRC-1 in the aorta of WT and genetically-obese mice. Results are presented as mean ± SD; n=8-12 per group. p values refer to Student’s t-test.

**
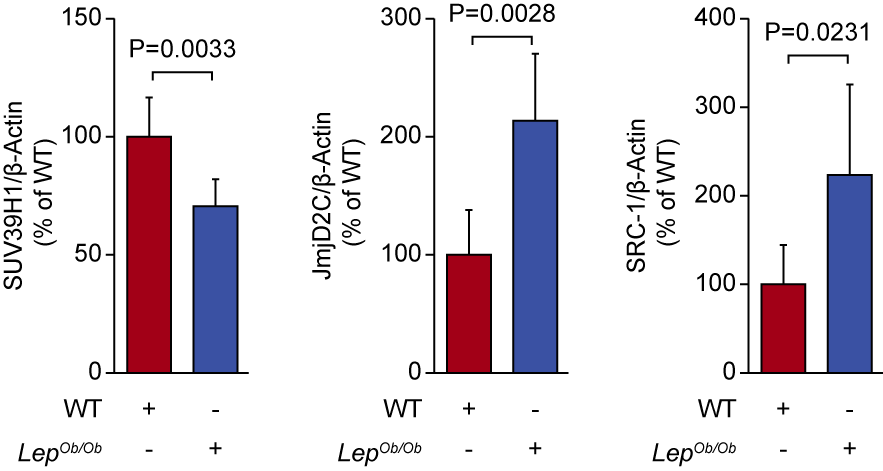
**

**Figure S6**. Bars show densitometric quantification of Western blot for SUV39H1, JMJD2C and SRC-1 in the aorta of WT and genetically-obese mice. Results are presented as mean ± SD; n=8 per group. p values refer to Student’s t-test.

**Supplemental Tables**

| **Gene** | **Obese vs Control (FC)** | **P value** |
| --- | --- | --- |
| DOT1L | 12.06 | .011 |
| NCOA6 | 8.74 | .004 |
| KDM5B | 5.98 | .021 |
| SETD4 | 5.88 | .043 |
| NCOA1 | 5.79 | .013 |
| SETD7 | 5.76 | .048 |
| RNF2 | 5.02 | .022 |
| USP21 | 4.49 | .024 |
| UBE2A | 4.30 | .005 |
| AURKC | 4.16 | .026 |
| PRMT5 | 3.99 | .385 |
| PRMT3 | 3.72 | .048 |
| CDYL | 3.33 | .025 |
| HDAC4 | 2.96 | .013 |
| UBE2B | 3.52 | .397 |
| AURKB | 3.51 | .015 |
| KAT7 | 3.50 | .015 |
| KAT5 | 3.48 | .012 |
| KDM4C | 3.27 | .007 |
| SETD2 | 3.24 | .018 |
| DNMT1 | 3.20 | .023 |
| NCOA3 | 3.11 | .022 |
| SETD3 | 2.81 | .436 |
| DNMT3B | 2.76 | .274 |
| RPS6KA5 | 2.52 | .513 |
| KAT2A | 2.40 | .454 |
| KAT6A | 2.36 | .457 |
| PAK1 | 2.36 | .009 |
| KDM5C | 2.33 | .449 |
| MLL | 2.15 | .430 |
| DNMT3A | 1.98 | .505 |
| SETD5 | 1.96 | .544 |
| SETD6 | 1.83 | 508 |
| PRMT1 | 1.79 | .602 |
| WHSC1 | 1.78 | .550 |
| KDM6B | 1.73 | .460 |
| HDAC1 | 1.65 | .184 |
| PRMT8 | 1.61 | .587 |
| PRMT7 | 1.58 | .655 |
| HDAC3 | 1.53 | .625 |
| MLL5 | 1.50 | .543 |
| CARM1 | 1.48 | .551 |
| ESCO2 | 1.48 | .530 |
| KDM1A | 1.48 | .495 |
| SUV420H1 | 1.47 | .327 |
| SETD8 | 1.42 | .484 |
| NEK6 | 1.38 | .481 |
| KAT8 | 1.34 | .736 |
| HAT1 | 1.33 | .384 |
| RNF20 | 1.30 | .387 |
| SETDB2 | 1.30 | .771 |
| HDAC5 | 1.26 | .710 |
| HDAC10 | 1.25 | .807 |
| SETDB1 | 1.24 | .527 |
| SMYD3 | 1.16 | .743 |
| CSRP2BP | 1.13 | .891 |
| ATF2 | 1.10 | .855 |
| AURKA | 1.02 | .979 |
| KAT6B | -1.05 | .952 |
| HDAC6 | -1.06 | .923 |
| MYSM1 | -1.08 | .870 |
| ESCO1 | -1.15 | .874 |
| HDAC9 | -1.18 | .830 |
| KAT2B | -1.18 | .688 |
| DZIP3 | -1.24 | .606 |
| USP16 | -1.28 | .617 |
| HDAC2 | -1.40 | .417 |
| CIITA | -1.41 | .713 |
| USP22 | -1.45 | .613 |
| PRMT2 | -1.53 | .415 |
| MBD2 | -1.73 | .121 |
| HDAC11 | -1.77 | .563 |
| HDAC7 | -1.85 | .239 |
| KDM4A | -2.15 | .035 |
| NSD1 | -2.53 | .330 |
| SETD1B | -2.61 | .026 |
| PRMT6 | -2.68 | .410 |
| SETD1A | -2.69 | .404 |
| RPS6KA3 | -2.70 | .018 |
| ASH1L | -3.06 | .277 |
| EHMT2 | -3.34 | <.001 |
| HDAC8 | -3.79 | .008 |
| MLL3 | -5.23 | .546 |
| SUV39H1 | -6.99 | .005 |

**Table S1.** Real time PCR array for chromatin modifying enzymes in visceral fat arteries from obese patients and normal weight controls. A two-fold change (FC) and p value <0.05 were considered to indicate significant variations. p values refer to Student’s t-test.
